# Supplementary material for: Observations of ozone depletion events in a Finnish boreal forest
Source: Copernicus journal article supplement (doi:10.5194/acp-2017-416), 2017-06-22
Supplement: Supplementary file [file acp-2017-416-AC1-supplement.pdf]

We appreciate the careful review provided by the referee. Below are our responses to the comments of the referee. Changes in the revised manuscript are marked in red and in italics in the responses.

**1. The depletion events occur in Autumn and Winter when the temperature is low and relative humidity is high. No plant photosynthesis/production occurs during this period (i.e. no stomatal uptake of ozone). Also no substantial BVOC emissions occur during the winter at cold T. The ozone depletion events appear to be mostly driven by dynamics under the shallow winter boundary layer conditions. The ozone must be sticking to the plant and soil surfaces and draining away. Is there snow on the ground during the periods? Why does the human population care about these ozone depletion events in the winter? The ozone concentrations are actually quite high in and around the canopy in the spring and summer.**

Yes. We agree with the reviewer that ozone depletions observed at our site are likely caused by ozone deposition onto surfaces. However, we cannot exclude the role of chemistry completely based on our analysis.

Snow on the ground is common in winter at our measurement site. This information is added into the revised manuscript in sections 2 and 2.3.

*Snow on the ground during winter months is common at our measurement site...*

*No screening according to snow on the ground was taken into account in our data analysis.*

O<sub>3</sub> is one of the major oxidants in the atmosphere and the O<sub>3</sub> depletion has the potential to significantly alter the atmospheric chemistry of the depleted region. This influences atmospheric oxidation capacity with consequences on related trace gas removal and secondary aerosol particle formation, and thus affects local and regional air quality. Therefore, it is worth investigating into this phenomenon and understanding the frequency of its occurrence.

During summer and spring, transportation from continental areas may bring additional ozone or ozone precursors to our site. We clarified in section 2 that our site can receive transported pollutants.

*... and our site can receive transported pollutants from nearby cities (e.g. Tampere and Helsinki) and continental areas (Riuttanen et al., 2013).*

**2. The median ozone concentrations at all levels are rather high in spring (40 ppbv) and summer (~35 ppbv). Conventional knowledge has indicated that the ozone concentrations should be lower than these values in “pristine” forested environments.**

**These values suggest that there is net production of ozone occurring under the forest conditions. Are the BVOC emissions contributing to this production? People generally believe, perhaps wrongly, that BVOCs in “pristine” forested environments reduce ozone levels by direct reaction. This dataset seems to suggest otherwise? Can we learn anything about the preindustrial atmosphere from these results?**

BVOCs may contribute to ozone production at the presence of NO<sub>x</sub>. Our measurement site cannot be considered as a ‘pristine’ environment, because we certainly receive transported pollutants, such as NO<sub>x</sub> and O<sub>3</sub> (Riuttanen et al., 2013). By carefully selecting data from the clean sectors based on air mass trajectory analysis, it might be possible to get some idea about preindustrial conditions, but we are afraid that such an analysis would substantially complicate our data treatment and is, therefore, out of the scope of this paper.

**3. I am surprised by the measured NO<sub>x</sub> concentrations. It is somewhat difficult to see exactly from Figure 10, but it looks like NO<sub>x</sub> is in 1-3 ppbv range increasing to 5ppbv in sporadic dynamical events. Where do these relatively high NO<sub>x</sub> levels come from in this environment?**

These relatively high NO<sub>x</sub> may be caused by transported sources emitted from nearby cities and from continental areas (e.g.(Riuttanen et al., 2013)).

**4. Figure 7 is intriguing. Ozone concentrations have a very strong positive relationship with temperature, but not so much with global shortwave radiation. The higher ozone concentrations show relatively limited relationship with global radiation, while the lower ozone concentrations show a weak positive trend with increasing shortwave. What is the cause of this behaviour?**

Figure 7 is based on all 10-min data collected during 1996-2016. The pattern between global radiation and ozone concentrations can be complicated by seasonal and diurnal variations in meteorological parameters, boundary layer heights as well as physical, chemical and biological sinks for ozone. We apologise that the figure caption was not clear enough and it is improved in the revised manuscript.

*Figure7. Ozone concentrations vs. a) relative humidity (RH), b) global radiation, c) temperature (T), and d) wind speed. Plots are made with 10-min data collected from the 16.8-m measurement level during 1996-2016, with an exception of the global radiation data from 18 m.*

**5. Some other previous studies do report very low measured ozone concentrations in the Amazon forest canopy, which certain global models are unable to reproduce (e.g. Pacifico et al., ACP, 2015).**

We thank the reviewer for this valuable comment. Indeed Pacifico et al. (2015) have observed low ozone concentrations in the Amazon forest. However, their measurements of ozone were carried out at one single height: 5 m above ground level (agl) in Porto Velho and 39 m agl in Cuieiras forest reserve. An article cited by Pacifico et al reported a gradient observed in ozone concentrations at another Amazonian cite: the ozone concentration was about 15 ppb at 50 m, which decreased down to below 5 ppb as moving to the ground level (Rummel et al., 2007). Although low ozone concentrations were reported by Pacifico et al. (2015) and Rummel et al. (2007), their ozone data showed an expected diurnal cycle, being high during daytime as a result of photochemical production, which is different from our focus in this manuscript – ozone depletion events. However, we added citations to Pacifico et al. (2015) and Rummel et al. (2005) in the introduction to point out that low surface ozone concentrations have been reported also in the Amazonian forest.

*Also low surface ozone concentrations were reported at different sites in the Amazonian forest (Rummel et al., 2007; Pacifico et al., 2015).*

**6. In the past 20 years, massive global environmental change has taken place. Is there any evidence for trends in the ozone concentrations and their drivers across the past 2 decades?**

In our ozone data, no clear trend could be observed. Please see the following figure. We made boxplots for daily median ozone concentrations over 1996-2016. Data collected at different heights were plotted into different subfigures. In 1996 and 2016, data were available only for half of the year. Data were all from the first half of the year in 2016 whereas data were mainly from the latter half of the year in 1996. Without these two years taken into account, no very clear trend is identifiable.

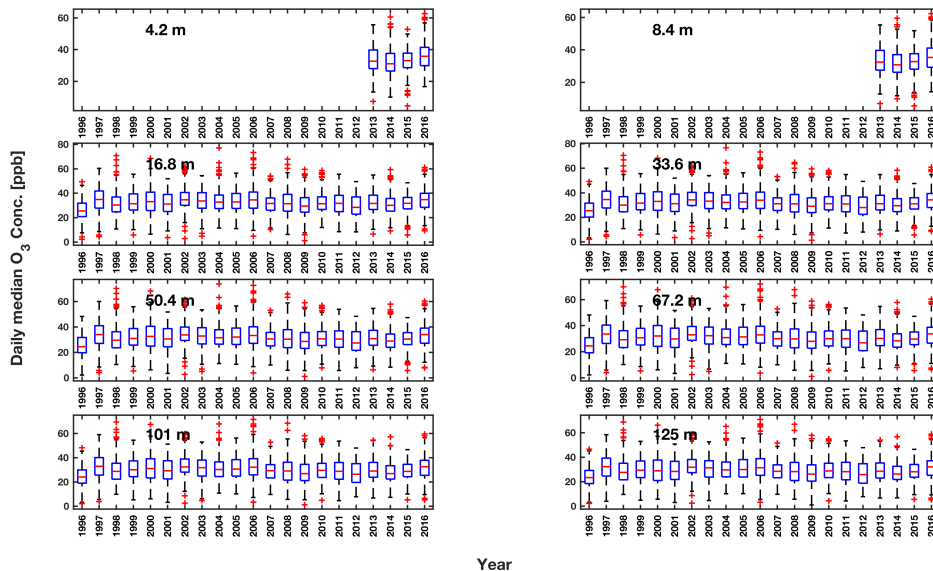

Year

**7. Page 1, Line 38: “The loss processes of tropospheric ozone include dry and wet deposition”. Please correct. Ozone itself does not wet deposit. Ozone precursors do wet deposit.**

We appreciate that the reviewer spotted this out. The sentence is modified as

*The tropospheric ozone is reduced directly by dry deposition, photolysis and reactions with other trace gases and indirectly via wet deposition of ozone precursors. The dry deposition of ozone can be enhanced under moist conditions (Fuentes et al., 1992).*

**References:**

Fuentes, J. D., Gillespie, T. J., Hartog, G. d., and Neumann, H. H.: Ozone deposition onto a deciduous forest during dry and wet conditions, *Agricultural and Forest Meteorology*, 62, 1-18, 1992.

Pacifico, F., Folberth, G. A., Sitch, S., Haywood, J. M., Rizzo, L. V., Malavelle, F. F., and Artaxo, P.: Biomass burning related ozone damage on vegetation over the Amazon forest: a model sensitivity study, *Atmospheric Chemistry and Physics*, 15, 2791-2804, 10.5194/acp-15-2791-2015, 2015.

Riuttanen, L., Hulkkonen, M., Dal Maso, M., Junninen, H., and Kulmala, M.: Trajectory analysis of atmospheric transport of fine particles, SO<sub>2</sub>, NO<sub>x</sub> and O<sub>3</sub> to the SMEAR II station in Finland in 1996-2008, *Atmos. Chem. Phys.*, 13, 2153-2164, 10.5194/acp-13-2153-2013, 2013.

Rummel, U., Ammann, C., Kirkman, G. A., Moura, M. A. L., Foken, T., Andreae, M. O., and Meixner, F. X.: Seasonal variation of ozone deposition to a tropical rain forest in southwest Amazonia, *Atmos. Chem. Phys.*, 7, 5415–5435, 2007.
